# Supplementary material for: In situ investigation of perovskite solar cells’ efficiency and stability in a mimic stratospheric environment for high-altitude pseudo-satellites
Source: Royal Society of Chemistry journal article supplement (doi:10.1039/c9tc04984c), 2019-12-09
Supplement: c9tc04984c1.pdf [file c9tc04984c1.pdf]

## Supporting Information

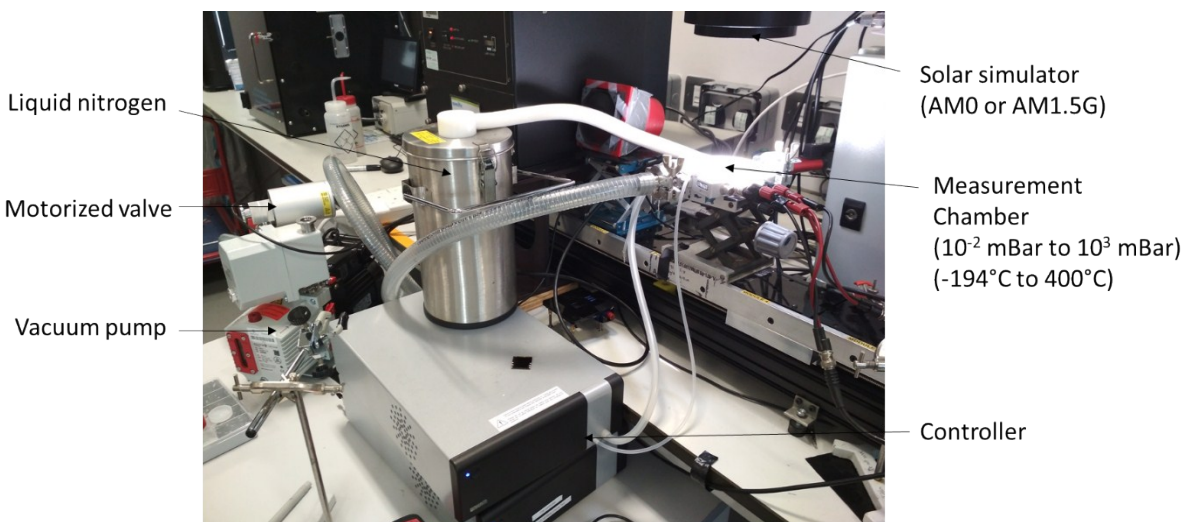

**Figure S1.** Set-up used for current-voltage measurements of perovskite solar cells under mimic HAPS environment.

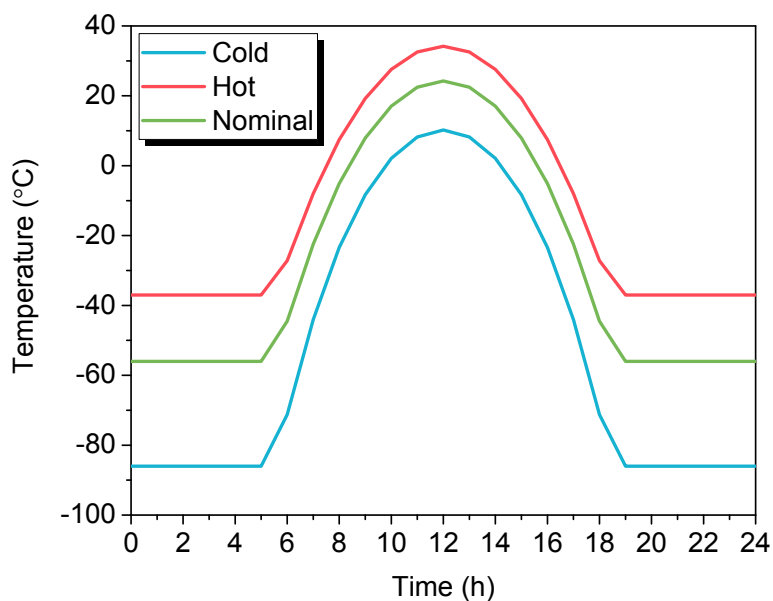

**Figure S2.** Solar cells temperature throughout the day in stratosphere calculated at summer solstice, -15° latitude in southern hemisphere. Values of -86°C (cold), -56°C (nominal) and -37°C (hot) were taken as assumptions for the outside air temperature at night. The cold and hot temperatures represent the extreme cases found in stratosphere.

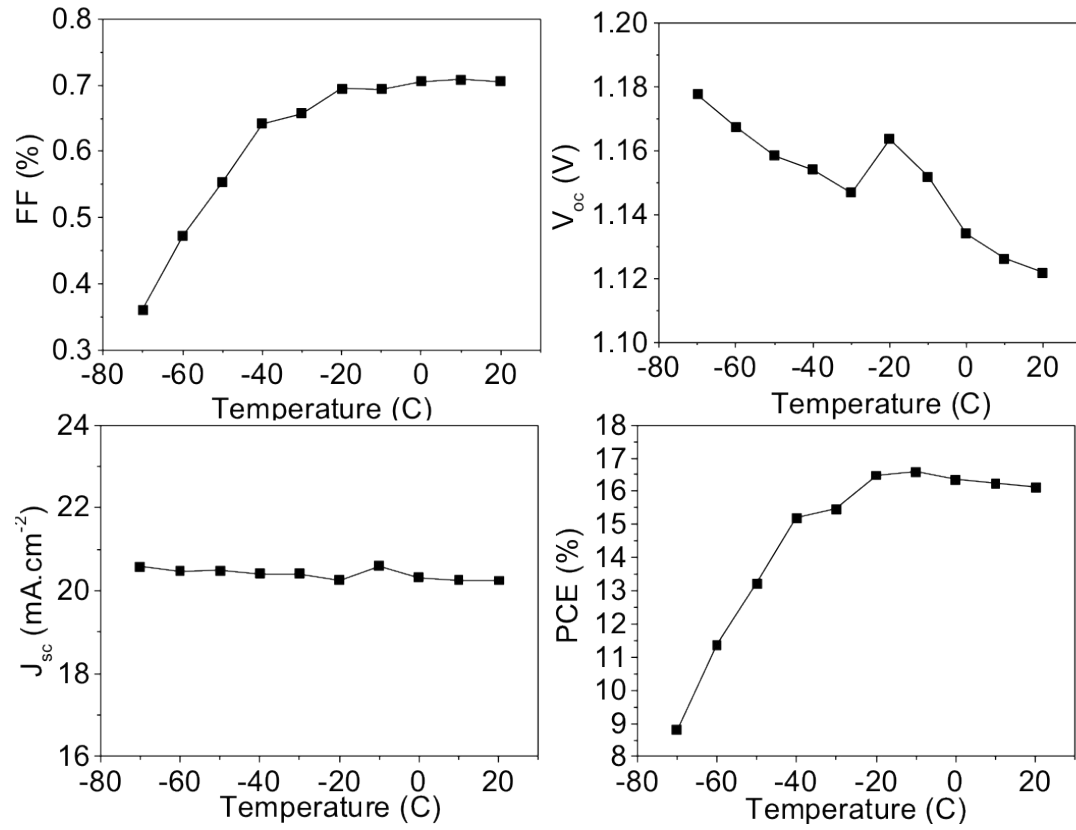

**Figure S3.** PV parameters (fill factor,  $V_{oc}$ ,  $J_{sc}$  and PCE) of perovskite solar cells measured between -70°C and +20°C under constant AM1.5G illumination and vacuum (10 mbar).

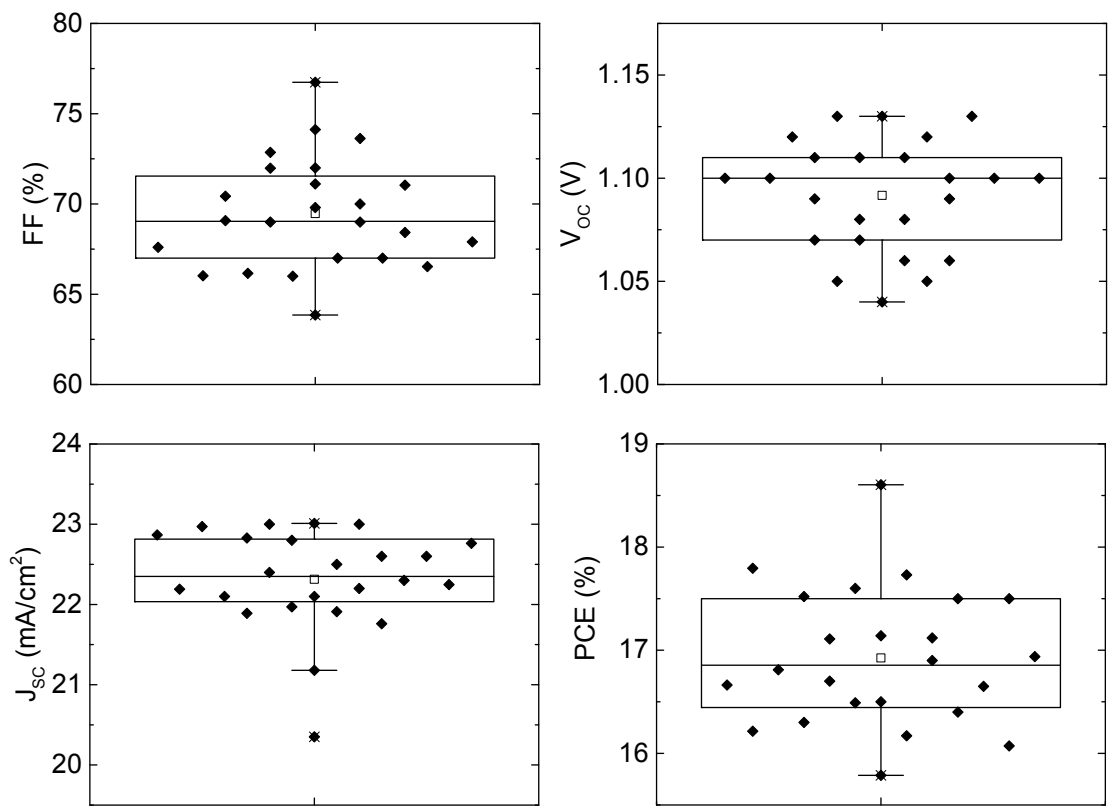

**Figure S4.** Statistical result of the device parameters under AM1.5G.

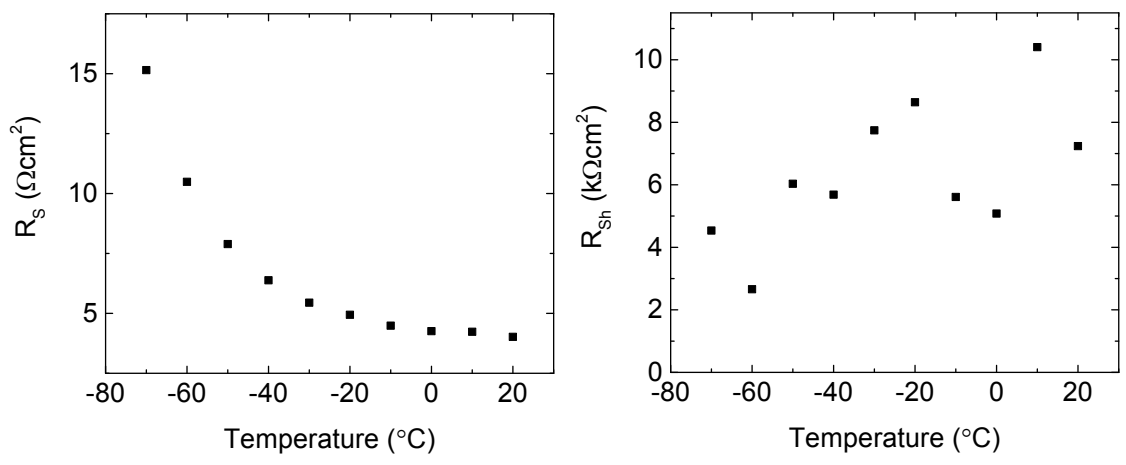

**Figure S5.** Series resistance ( $R_s$ ) and shunt resistance ( $R_{sh}$ ) at different temperatures extracted from the inverses of the slopes at  $V_{oc}$  and  $J_{sc}$ , respectively.

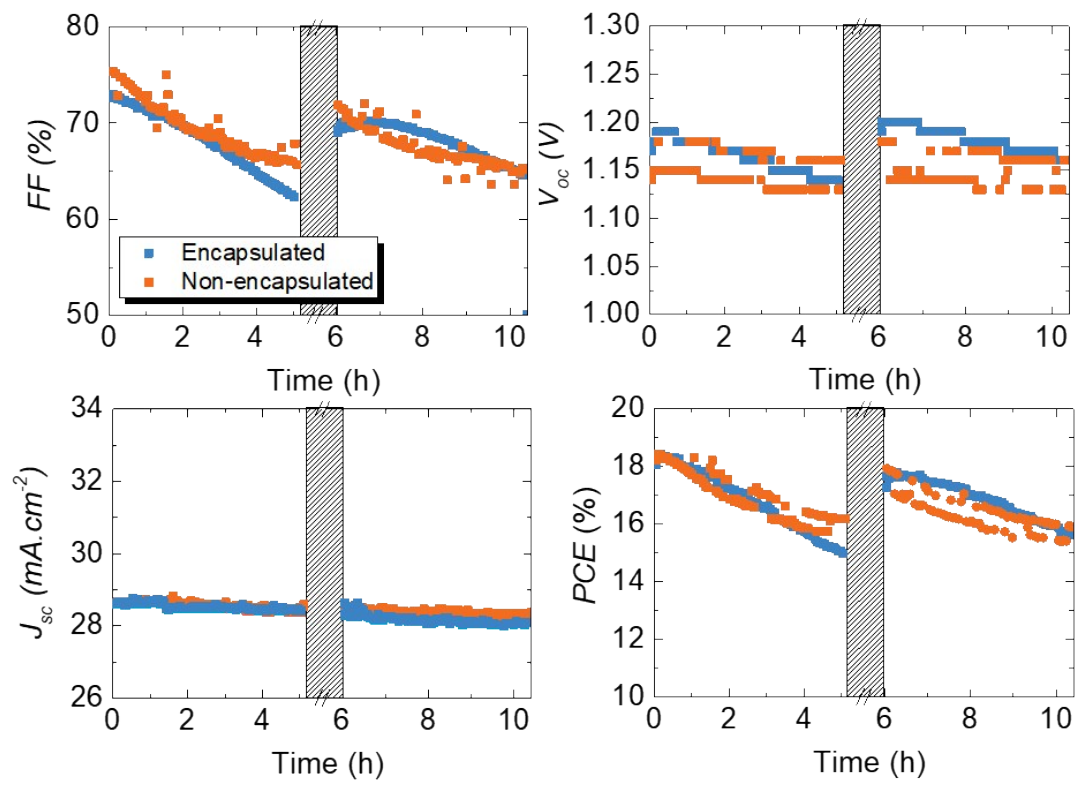

**Figure S6.** Variations in PV parameters of encapsulated and non-encapsulated devices measured at 10 mbar and 25°C under AM1.5G illumination.
